# Supplementary material for: Multifunctional-separation-mode ion chromatography method for determining major metabolites during multiple parallel fermentation of rice wine
Source: Royal Society of Chemistry journal article supplement (doi:10.1039/d4ay00591k), 2024-01-01
Supplement: d4ay00591k1.pdf [file d4ay00591k1.pdf]

## Electronic Supplementary Information

### **Multifunctional-Separation-Mode Ion Chromatography Method for Determining Major Metabolites during Multiple Parallel Fermentation of Rice Wine**

Atsushi Hashigami,<sup>a</sup> Ryousei Tamura,<sup>a</sup> Chihiro Takezaki,<sup>a</sup> Tohru Asano,<sup>b</sup> Taichi Yoshinaka,<sup>b</sup> Kentarou Hirano,<sup>b</sup> Akihiko Takemura,<sup>b</sup> Hideyuki Yamashita,<sup>c</sup> Akira Nose,<sup>d</sup> and Daisuke Kozaki\*<sup>a</sup>

<sup>a</sup> Department of Chemistry and Biotechnology, Faculty of Science and Technology, Kochi University, 2-5-1 Akebono-cho, Kochi city, Kochi 780-8520, Japan.

<sup>b</sup> Department of Brewing, Tsukasa Botan Brewing Company, Limited, 1299 Ko, Sakawa-cho, Takaoka-gun, Kochi 789-1201, Japan.

<sup>c</sup> Higuchi Matsunosuke Shoten Company, Limited, 1-14-2, Harimacho, Abeno-ku, Osaka-shi, Osaka-fu 545-0022, Japan.

<sup>d</sup> Department of Nutritional Science, Faculty of Human Ecology, Yasuda Women's University, 6-13-1, Yasuhigashi, Hiroshima Asaminami-ku, Hiroshima 731-0153, Japan.

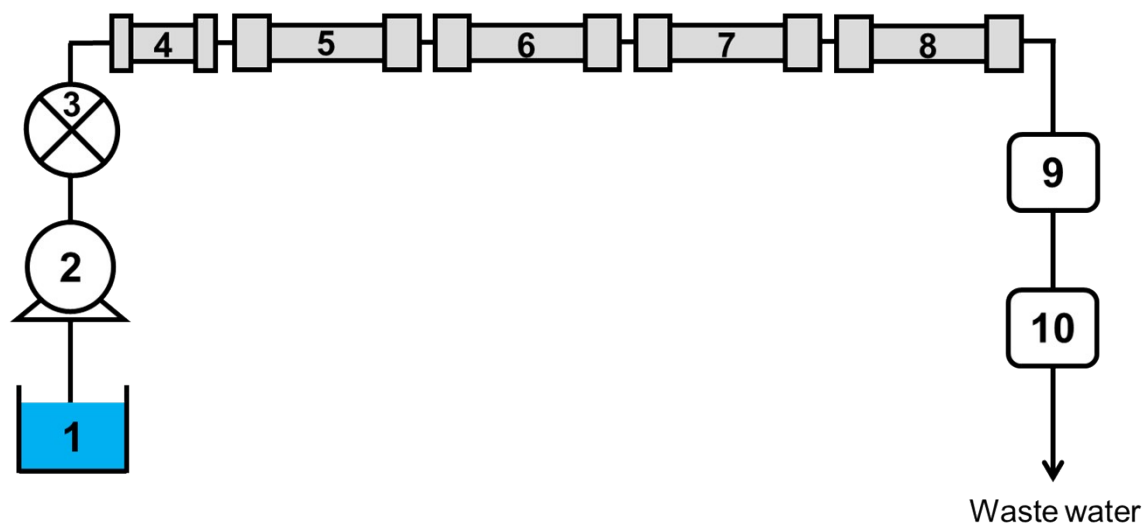

**Figure S1.** Schematic illustration of the proposed chromatographic system. 1: eluent bottle; 2: pumps for eluent; 3: sample injector; 4: guard column; 5, 6, 7, and 8: separation columns; 9: conductivity detector; and 10: refractive index detector.

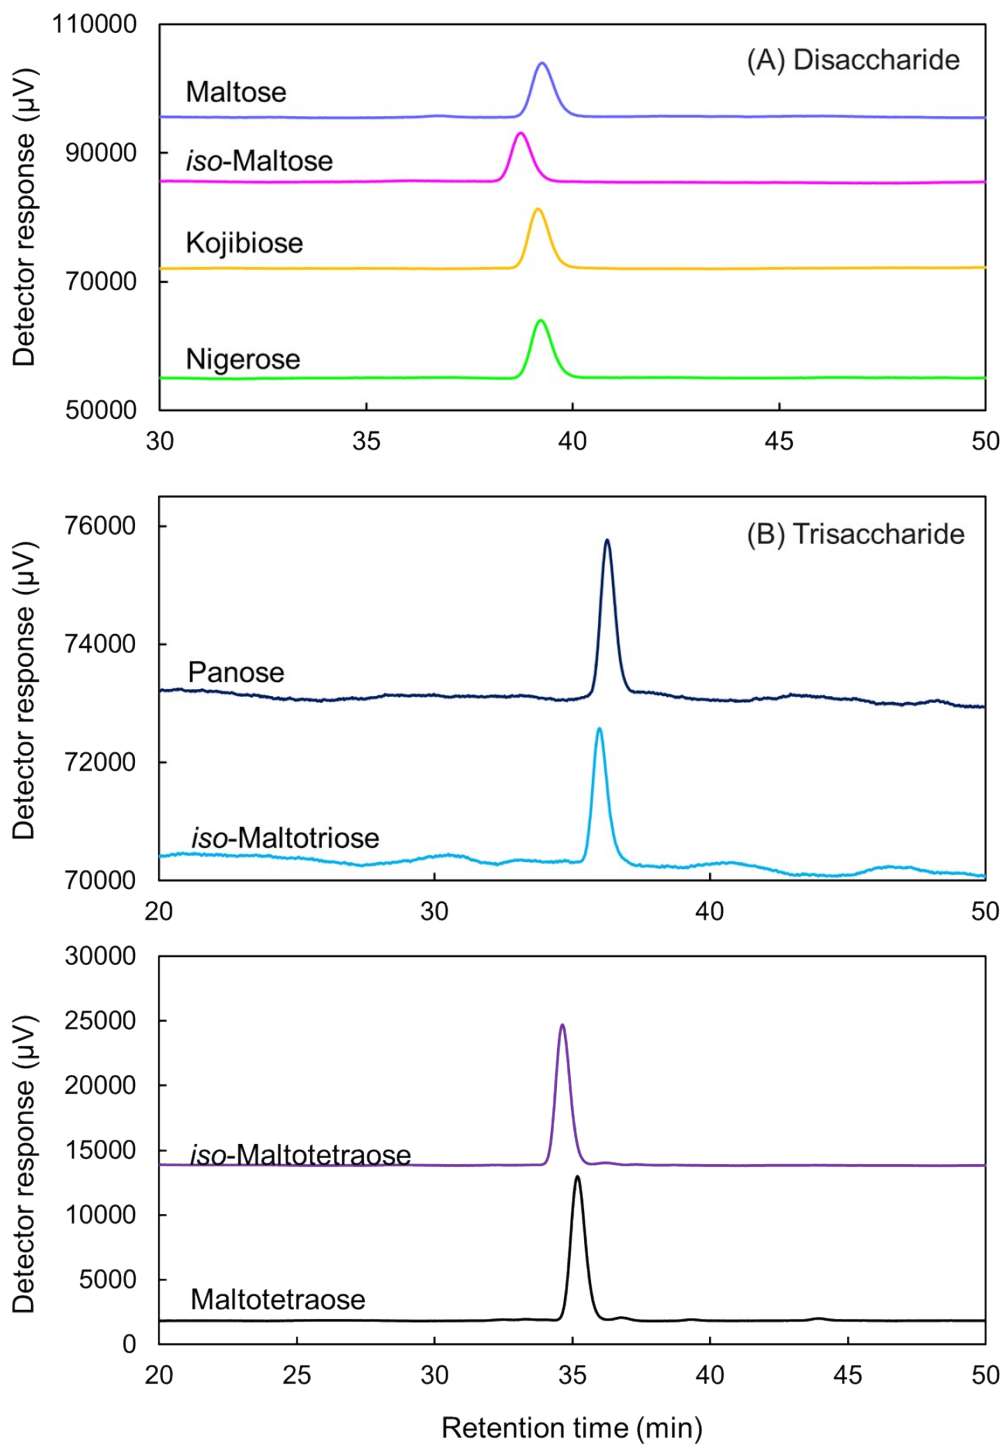

**Figure S2.** Comparison of the peak areas for (A) four disaccharides, (B) two trisaccharides, and (C) two tetrasaccharides.

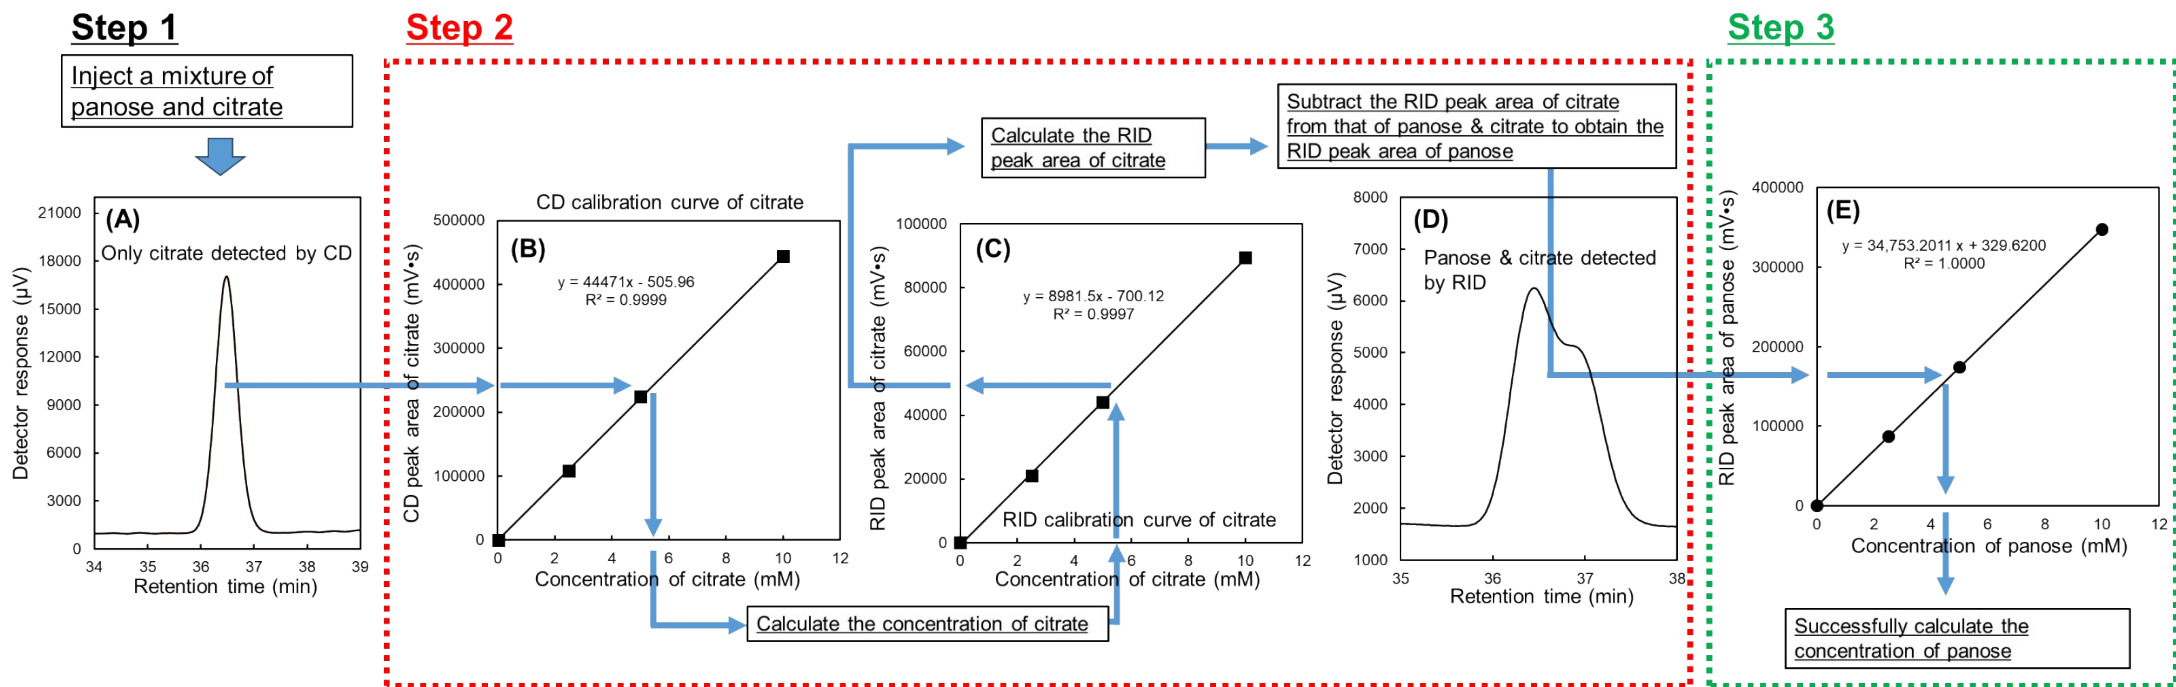

**Figure S3.** Graphical depiction of the steps involved in calculating the concentrations for overlapping peaks: (A) chromatogram of citrate detected using the conductivity detector (CD), (B) calibration curve of citrate detected using the CD, (C) calibration curve of citrate detected using the refractive index detector (RID), (D) chromatogram of panose and citrate detected using the RID, and (E) calibration curve of panose detected using the RID.

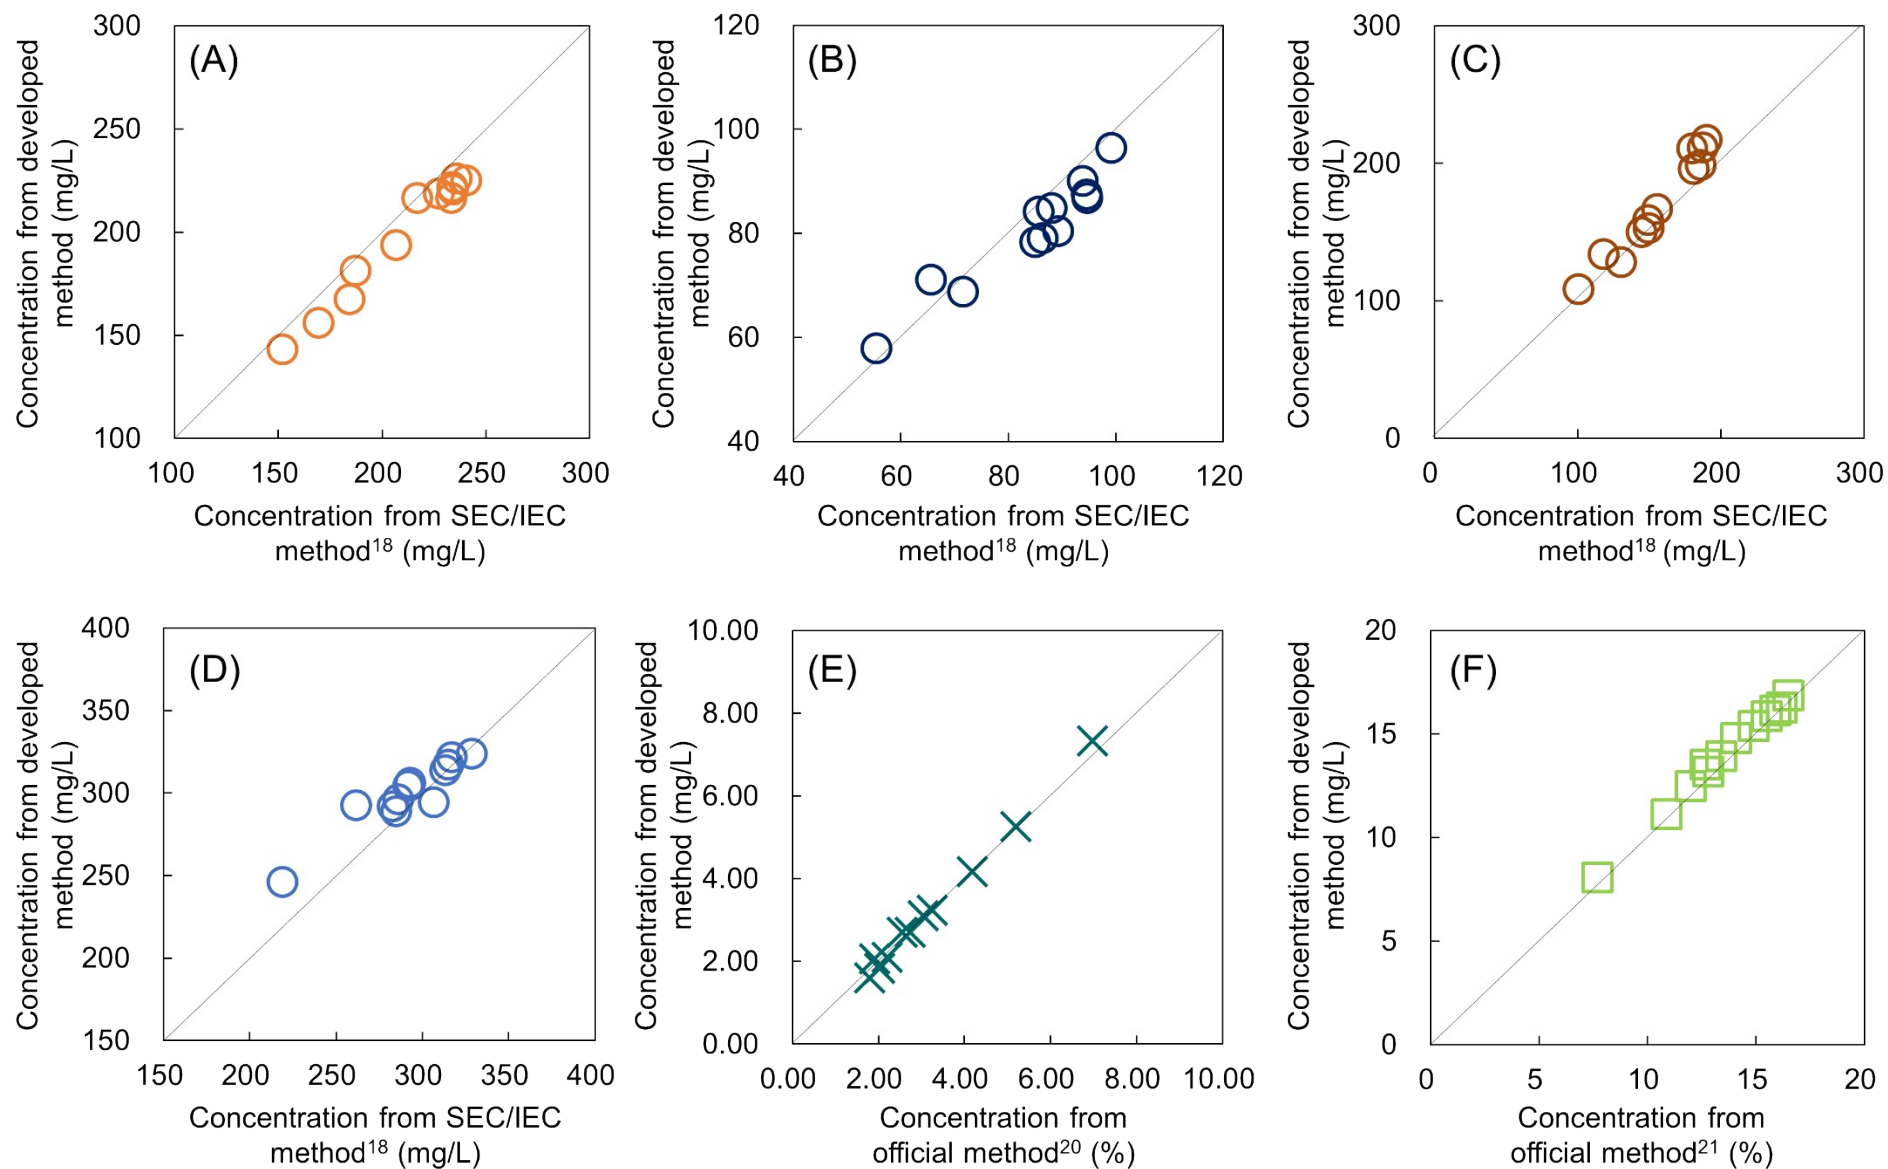

**Figure S4.** Comparison of concentrations determined using our developed method and other methods: (A) pyruvate, (B) citrate, (C) L-malate, (D) succinate, (E) glucose, and (F) ethanol. The experimental conditions are the same as those in Figure 3. SEC: size-exclusion chromatography; IEC: ion-exclusion chromatography.

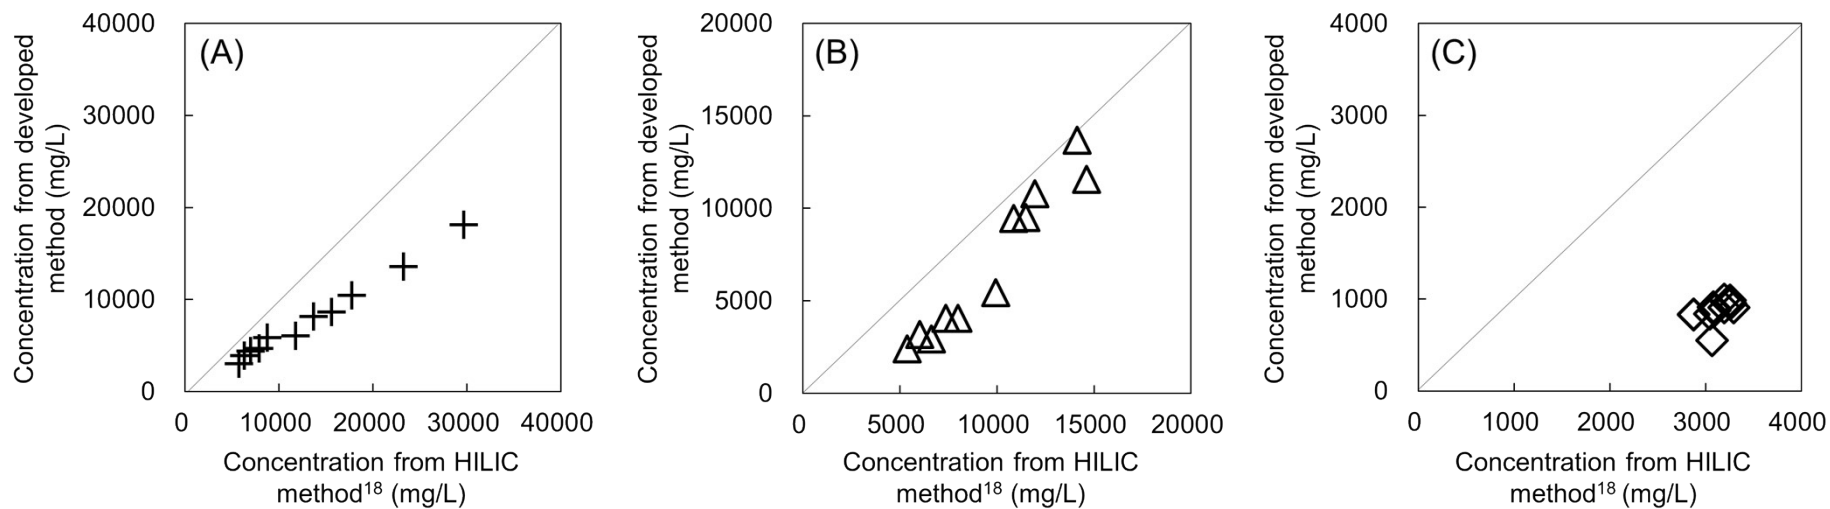

**Figure S5.** Comparison of concentrations determined using our developed method and other methods: (A) disaccharides, (B) trisaccharides, and (C) tetrasaccharides.

The experimental conditions for the developed method are the same as those in Figure 3. HILIC: hydrophilic interaction liquid chromatography.

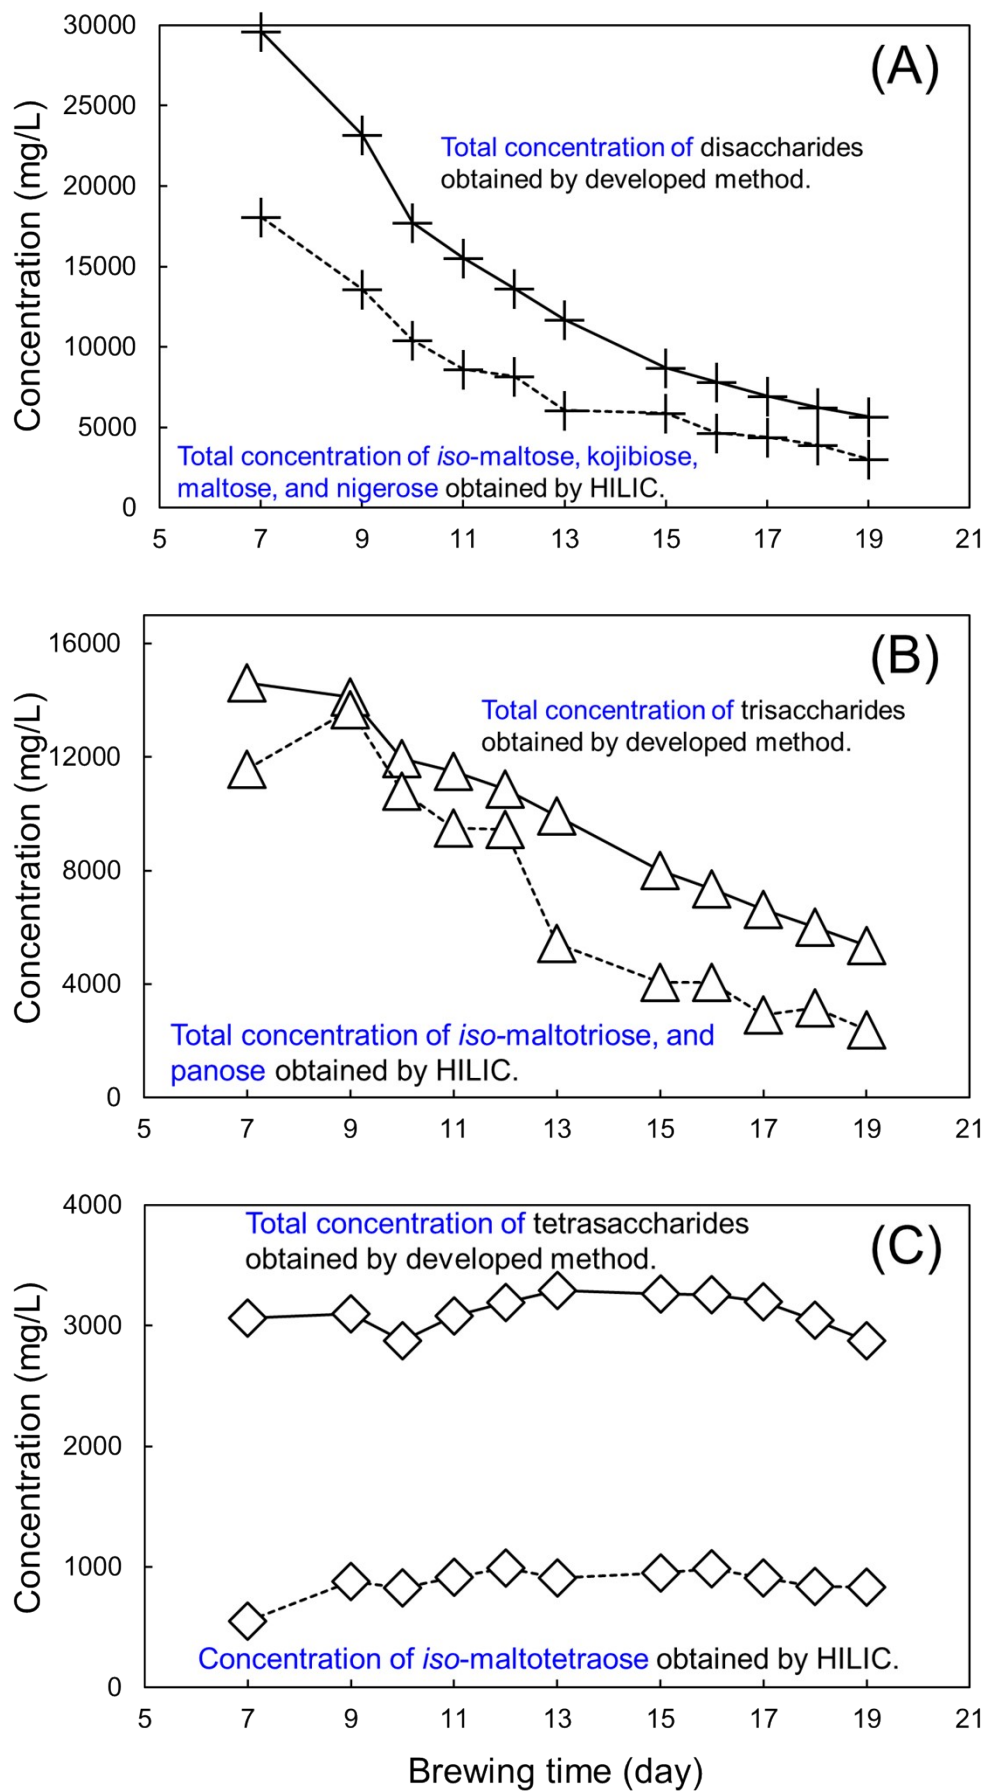

**Figure S6.** Comparison of the changes in the total concentrations of disaccharides, trisaccharides, and tetrasaccharides determined using our developed method and the total concentrations of disaccharides (*iso*-maltose, kojibiose, maltose, and nigerose), trisaccharides (*iso*-maltotriose and panose), and tetrasaccharides (*iso*-maltotetraose) quantitated using the HILIC method. The experimental conditions for the developed method are the same as those in Figure 3.

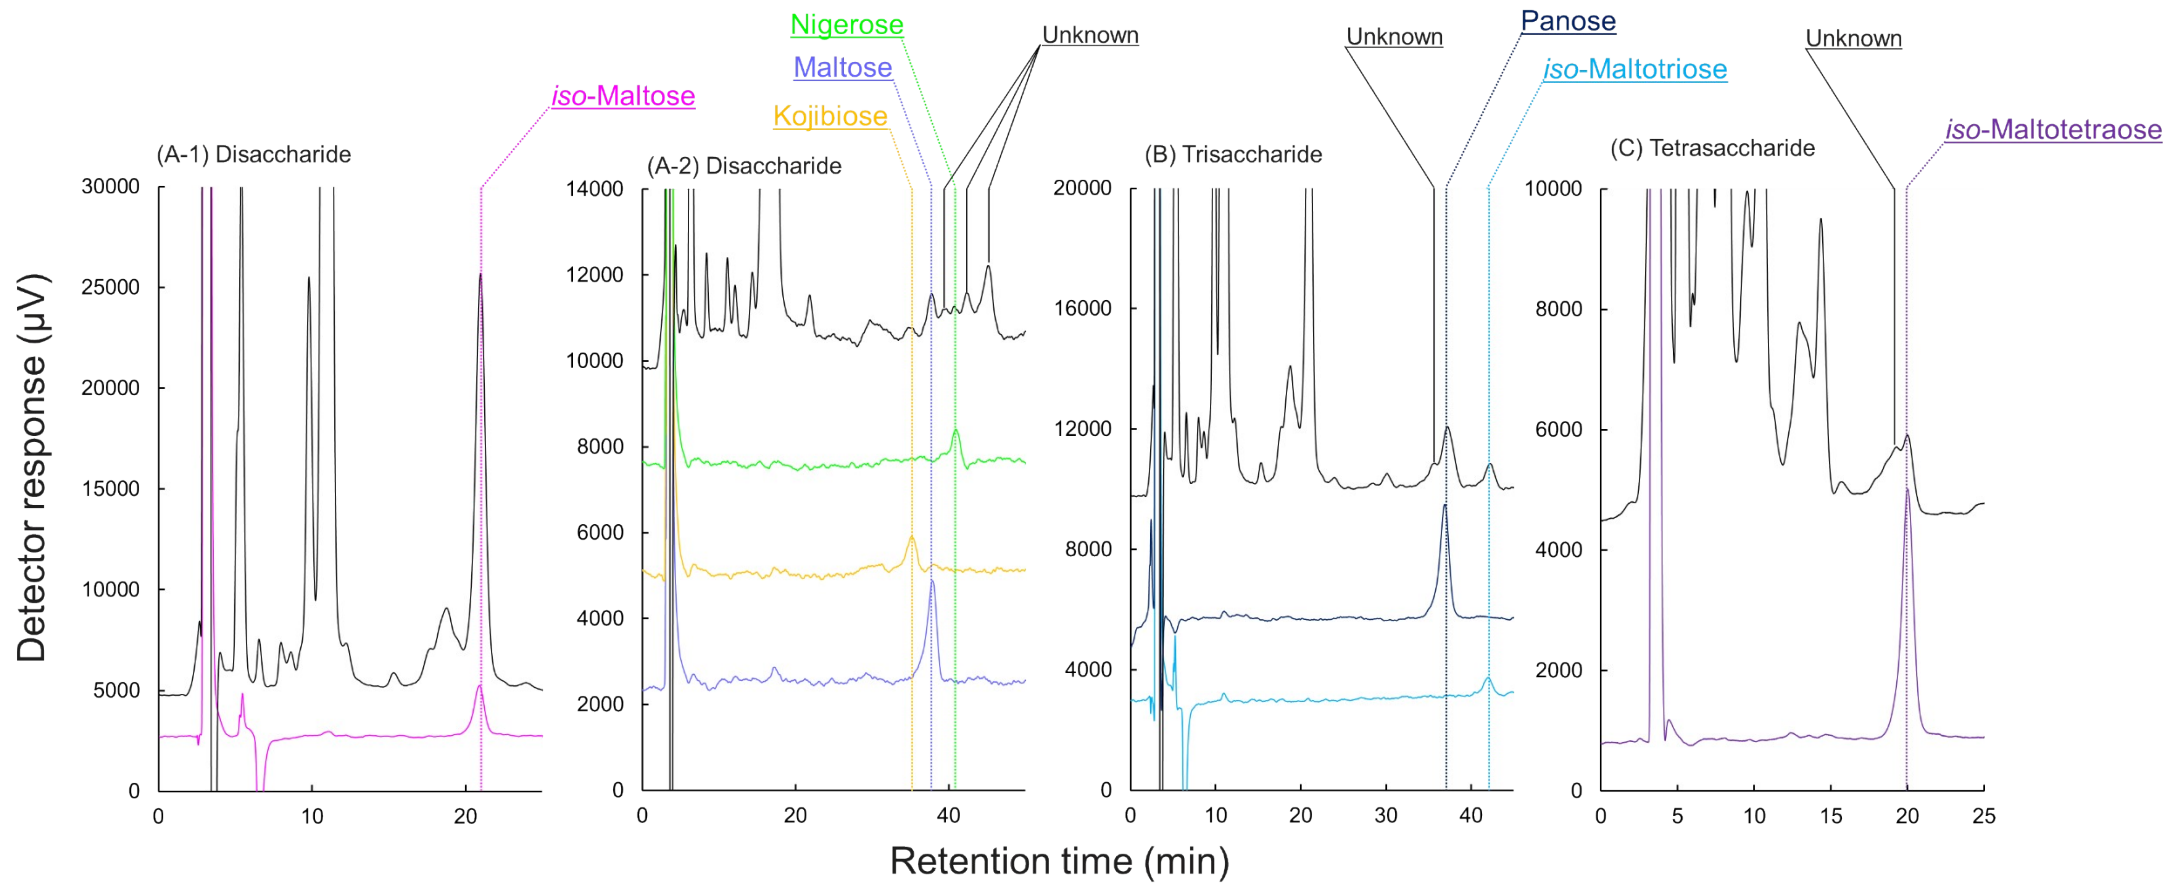

**Figure S7.** Separation of unknown oligosaccharides using HILIC: (A-1, A-2) disaccharides, (B) trisaccharides, and (C) tetrasaccharides.



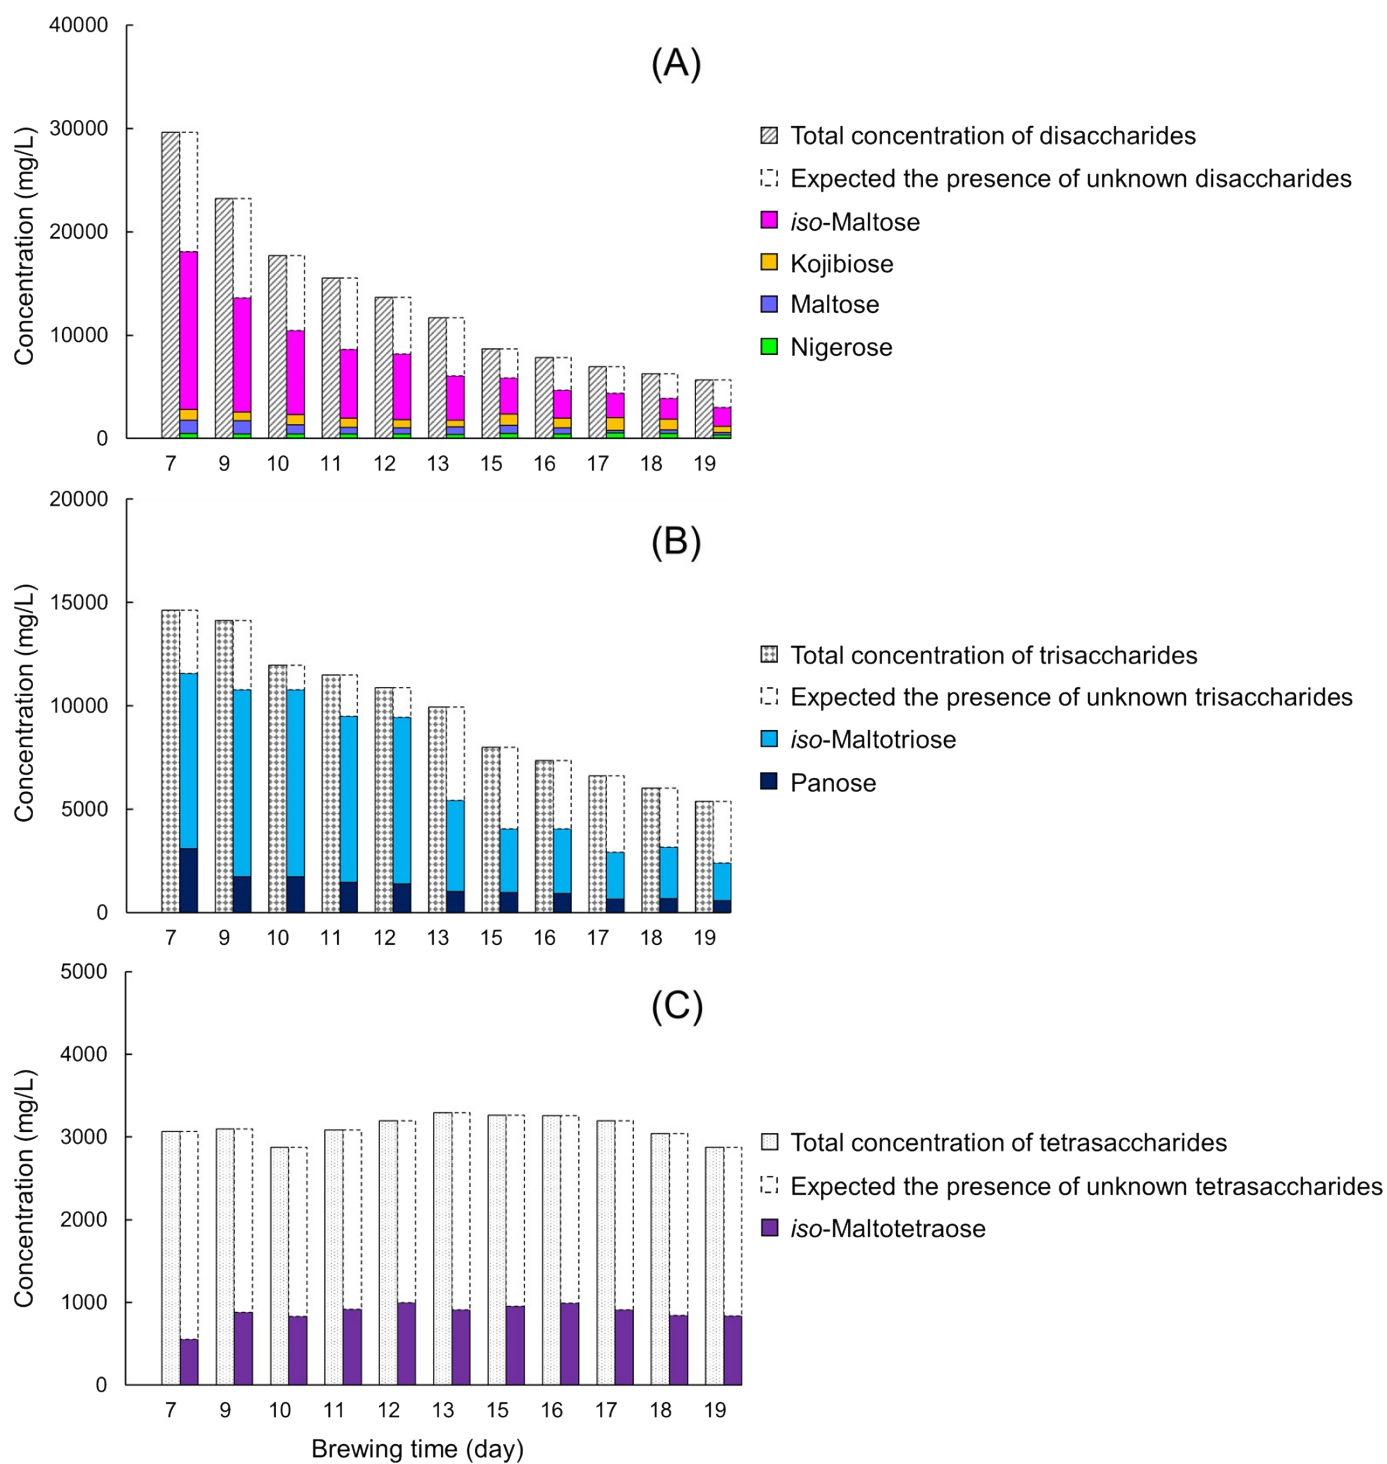

**Figure S8.** Comparison of the changes in the total concentrations of disaccharides, trisaccharides, and tetrasaccharides determined using our developed method and the expected concentrations of unknown oligosaccharides when considering the total concentrations of disaccharides (*iso*-maltose, kojibiose, maltose, and nigerose), trisaccharides (*iso*-maltotriose and panose), and tetrasaccharides (*iso*-maltotetraose) quantitated using the HILIC method. The experimental conditions for the developed method are the same as those in Figure 3.

**Table S1.** List of reagents.

| Chemical reagent            | Reagent grade              | Distributor                                    |
|-----------------------------|----------------------------|------------------------------------------------|
| Citrate                     | Wako special grade         | FUJIFILM Wako Pure Chemical Co. (Osaka, Japan) |
| L-Malate                    | Wako 1 <sup>st</sup> grade | FUJIFILM Wako Pure Chemical Co. (Osaka, Japan) |
| Fumarate                    | —                          | FUJIFILM Wako Pure Chemical Co. (Osaka, Japan) |
| Succinate                   | Wako special grade         | FUJIFILM Wako Pure Chemical Co. (Osaka, Japan) |
| $\alpha$ -Ketoglutarate     | Wako special grade         | FUJIFILM Wako Pure Chemical Co. (Osaka, Japan) |
| Phosphate                   | Guaranteed reagent         | FUJIFILM Wako Pure Chemical Co. (Osaka, Japan) |
| Phthalate                   | Wako special grade         | FUJIFILM Wako Pure Chemical Co. (Osaka, Japan) |
| Glucose                     | Guaranteed reagent         | FUJIFILM Wako Pure Chemical Co. (Osaka, Japan) |
| Xylose                      | Wako special grade         | FUJIFILM Wako Pure Chemical Co. (Osaka, Japan) |
| Mannitol                    | Guaranteed reagent         | FUJIFILM Wako Pure Chemical Co. (Osaka, Japan) |
| Arabinose                   | —                          | FUJIFILM Wako Pure Chemical Co. (Osaka, Japan) |
| Galactose                   | Wako special grade         | FUJIFILM Wako Pure Chemical Co. (Osaka, Japan) |
| Maltose                     | Wako 1 <sup>st</sup> grade | FUJIFILM Wako Pure Chemical Co. (Osaka, Japan) |
| Kojibiose                   | For biochemistry           | FUJIFILM Wako Pure Chemical Co. (Osaka, Japan) |
| Glycerol                    | Wako 1 <sup>st</sup> grade | FUJIFILM Wako Pure Chemical Co. (Osaka, Japan) |
| Ethyl $\alpha$ -D-glucoside | For food analysis          | FUJIFILM Wako Pure Chemical Co. (Osaka, Japan) |
| Ethanol                     | Guaranteed grade           | FUJIFILM Wako Pure Chemical Co. (Osaka, Japan) |
| <i>iso</i> -Maltose         | —                          | Hayashibara Co. (Okayama, Japan)               |
| Panose                      | Guaranteed grade           | Hayashibara Co. (Okayama, Japan)               |
| Maltotetraose               | —                          | Hayashibara Co. (Okayama, Japan)               |
| <i>iso</i> -Citrate         | —                          | Sigma-Aldrich Co. (St. Louis, MO, USA)         |
| Nigerose                    | —                          | Sigma-Aldrich Co. (St. Louis, MO, USA)         |
| Pyruvate                    | —                          | Tokyo Chemical Industry Co. (Tokyo, Japan)     |
| <i>iso</i> -Maltotetraose   | HPLC grade                 | Tokyo Chemical Industry Co. (Tokyo, Japan)     |
| <i>cis</i> -Aconitate       | —                          | Alfa Aesar (Haverhill, MA, USA)                |
| <i>iso</i> -Maltotriose     | —                          | Combi-Blocks (San Diego, CA, USA)              |

**Table S2.** Analyte performance under the optimal conditions determined in this study.

| Analyte                   | Retention time (min) |      | RSD (%)*       |         |           |       | LOD**<br>( $\mu$ M, % for ethanol) |       | LOQ***<br>( $\mu$ M, % for ethanol) |       | Linearity range<br>(mM, % for ethanol) | Correlation coefficient |       | Additional recovery (%) |      |
|---------------------------|----------------------|------|----------------|---------|-----------|-------|------------------------------------|-------|-------------------------------------|-------|----------------------------------------|-------------------------|-------|-------------------------|------|
|                           |                      |      | Retention time |         | Peak area |       |                                    |       |                                     |       |                                        |                         |       |                         |      |
|                           | CD                   | RID  | CD             | RID     | CD        | RID   | CD                                 | RID   | CD                                  | RID   |                                        | CD                      | RID   | CD                      | RID  |
| Pyruvate                  | 33.3                 | N.D. | 0.0172         | —       | 0.122     | —     | 18.3                               | —     | 55.5                                | —     | 1.25-10                                | 0.999                   | —     | 103                     | —    |
| Citrate                   | 36.4                 | 36.9 | 0.0274         | 0.0313  | 0.349     | 0.288 | 13.3                               | 46.7  | 40.4                                | 142   | 1.25-10                                | 0.999                   | 0.999 | 102                     | 98.7 |
| <i>iso</i> -Citrate       | 37.8                 | 38.2 | 0.0458         | 0.109   | 0.710     | 0.222 | 28.1                               | 153   | 93.6                                | 465   | 1.25-10                                | 0.999                   | 0.999 | 99.1                    | 97.8 |
| Malate                    | 42.1                 | 42.5 | 0.0137         | 0.0235  | 0.281     | 0.252 | 24.2                               | 73.9  | 73.2                                | 224   | 1.25-10                                | 0.999                   | 0.999 | 99.2                    | 99.5 |
| Succinate                 | 50.3                 | 50.8 | 0.230          | 0.238   | 0.545     | 0.853 | 28.5                               | 102   | 86.4                                | 309   | 1.25-10                                | 0.999                   | 0.999 | 102                     | 99.6 |
| Fumarate                  | 48.8                 | 49.5 | 0.0516         | 0.0117  | 0.817     | 0.418 | 27.1                               | 172   | 82.1                                | 521   | 1.25-10                                | 0.999                   | 0.999 | 103                     | —    |
| Glucose                   | N.D.                 | 43.7 | —              | 0.0606  | —         | 0.485 | —                                  | 25.3  | —                                   | 76.7  | 10-500                                 | —                       | 0.999 | —                       | 103  |
| Maltose                   | N.D.                 | 39.1 | —              | 0.0443  | —         | 0.485 | —                                  | 15.6  | —                                   | 47.2  | 1.25-10                                | —                       | 0.999 | —                       | 102  |
| <i>iso</i> -Maltose       | N.D.                 | 38.6 | —              | 0.0150  | —         | 0.600 | —                                  | 22.5  | —                                   | 68.2  | 1.25-10                                | —                       | 0.999 | —                       | 101  |
| Kojibiose                 | N.D.                 | 39.0 | —              | 0.0513  | —         | 0.221 | —                                  | 22.1  | —                                   | 66.8  | 1.25-10                                | —                       | 0.999 | —                       | 98.8 |
| Nigerose                  | N.D.                 | 39.1 | —              | 0.0391  | —         | 0.206 | —                                  | 31.6  | —                                   | 94.1  | 1.25-5                                 | —                       | 0.999 | —                       | 101  |
| Panose                    | N.D.                 | 36.3 | —              | 0.0159  | —         | 0.646 | —                                  | 30.7  | —                                   | 93.0  | 1.25-10                                | —                       | 0.999 | —                       | 99.1 |
| <i>iso</i> -Maltotriose   | N.D.                 | 36.0 | —              | 0.0279  | —         | 0.574 | —                                  | 23.7  | —                                   | 71.8  | 1.25-10                                | —                       | 0.999 | —                       | 102  |
| <i>iso</i> -Maltotetraose | N.D.                 | 35.1 | —              | 0.0914  | —         | 0.468 | —                                  | 12.0  | —                                   | 36.4  | 1.25-10                                | —                       | 0.999 | —                       | 104  |
| Ethanol                   | 79.6                 | 80.3 | —              | 0.00720 | —         | 0.633 | —                                  | 0.036 | —                                   | 0.109 | 1.0-15                                 | —                       | 0.999 | —                       | 98.4 |

\* n = 5, \*\* S/N = 3.3, \*\*\* S/N = 10

|                     |      | Brewing time (days) |       |        |        |        |        |        |        |        |        |        |        |        |        |        |      |
|---------------------|------|---------------------|-------|--------|--------|--------|--------|--------|--------|--------|--------|--------|--------|--------|--------|--------|------|
|                     |      | 3                   | 5     | 7      | 9      | 10     | 11     | 12     | 13     | 14     | 15     | 16     | 17     | 18     | 19     | 20     |      |
| Pyruvate            | mg/L | 266                 | 217   | 222    | 225    | 219    | 226    | 221    | 217    | 209    | 194    | 182    | 167    | 156    | 143    | 129    |      |
| Citrate             |      | 48.4                | 57.9  | 68.8   | 78.4   | 71.2   | 79.1   | 84.3   | 87.5   | 84.9   | 80.5   | 90.1   | 96.5   | 84.9   | 86.8   | 88.3   |      |
| <i>iso</i> -Citrate |      | N.D.*               | N.D.  | N.D.   | N.D.   | N.D.   | N.D.   | N.D.   | N.D.   | N.D.   | N.D.   | N.D.   | N.D.   | N.D.   | N.D.   | N.D.   | N.D. |
| L-Malate            |      | 49.2                | 101   | 118    | 150    | 131    | 145    | 149    | 156    | 178    | 186    | 181    | 180    | 188    | 190    | 204    |      |
| Succinate           |      | 173                 | 219   | 262    | 292    | 285    | 286    | 283    | 293    | 312    | 317    | 315    | 307    | 313    | 329    | 334    |      |
| Fumarate            |      | N.D.                | N.D.  | N.D.   | N.D.   | N.D.   | N.D.   | N.D.   | N.D.   | N.D.   | N.D.   | N.D.   | N.D.   | N.D.   | N.D.   | N.D.   | N.D. |
| Disaccharides       |      | 33236               | 36086 | 29601  | 23213  | 17713  | 15542  | 13638  | 11685  | 8814   | 8697   | 7823   | 6935   | 6265   | 5663   | 5037   |      |
| Trisaccharides      |      | 9098                | 13463 | 14627  | 14121  | 11952  | 11502  | 10868  | 9934   | 7167   | 7994   | 7358   | 6621   | 6021   | 5372   | 4888   |      |
| Tetrasaccharides    |      | 5528                | 4412  | 3065   | 3096   | 2877   | 3084   | 3195   | 3294   | 2959   | 3262   | 3257   | 3197   | 3044   | 2877   | 2771   |      |
| Glucose             | mg/L | 100475              | 69754 | 51902  | 41763  | 32553  | 30358  | 27403  | 25560  | 28216  | 22006  | 20281  | 19176  | 18002  | 17290  | 16204  |      |
|                     | %    | 10.0                | 6.98  | 5.19   | 4.18   | 3.26   | 3.04   | 2.74   | 2.56   | 2.82   | 2.20   | 2.03   | 1.92   | 1.80   | 1.73   | 1.62   |      |
| Ethanol             | mg/L | 42310               | 80627 | 111248 | 131660 | 124618 | 135022 | 139127 | 148015 | 154633 | 153812 | 158506 | 161272 | 162608 | 168379 | 171842 |      |
|                     | %    | 4.23                | 8.06  | 11.1   | 13.2   | 12.5   | 13.5   | 13.9   | 14.8   | 15.5   | 15.4   | 15.9   | 16.1   | 16.3   | 16.8   | 17.2   |      |

**Table S3.** Analytical results for 15 brewing-processed rice wine samples.

\*N.D.: under the detection limit of the developed method

|           |             |           | Brewing time (days) |      |      |      |      |      |      |      |      |      |      |      |
|-----------|-------------|-----------|---------------------|------|------|------|------|------|------|------|------|------|------|------|
|           |             |           | 7                   | 9    | 10   | 11   | 12   | 13   | 15   | 16   | 17   | 18   | 19   |      |
| Pyruvate  | mg/L        | SEC/IEC   | 222                 | 225  | 219  | 226  | 221  | 217  | 194  | 182  | 167  | 156  | 143  |      |
|           |             | Method 1* | 234                 | 241  | 227  | 236  | 234  | 233  | 206  | 187  | 184  | 169  | 152  |      |
| Citrate   |             | SEC/IEC   | 68.8                | 78.4 | 71.2 | 79.1 | 84.3 | 87.5 | 80.5 | 90.1 | 96.5 | 84.9 | 86.8 |      |
|           |             | Method 1* | 71.6                | 85.0 | 65.6 | 86.5 | 85.7 | 94.6 | 89.4 | 93.9 | 99.2 | 88.1 | 94.7 |      |
| L-Malate  |             | SEC/IEC   | 118                 | 150  | 131  | 145  | 149  | 156  | 186  | 181  | 180  | 188  | 190  |      |
|           |             | Method 1* | 134                 | 153  | 128  | 150  | 159  | 167  | 199  | 196  | 211  | 212  | 217  |      |
| Succinate |             | SEC/IEC   | 262                 | 292  | 285  | 286  | 283  | 293  | 317  | 315  | 307  | 313  | 329  |      |
|           |             | Method 1* | 293                 | 304  | 289  | 296  | 292  | 306  | 322  | 317  | 294  | 314  | 324  |      |
| Glucose   |             | %         | SEC/IEC             | 5.19 | 4.18 | 3.26 | 3.04 | 2.74 | 2.56 | 2.20 | 2.03 | 1.92 | 1.80 | 1.73 |
|           |             |           | Method 2**          | 5.27 | 4.17 | 3.23 | 3.10 | 2.70 | 2.70 | 2.10 | 1.83 | 2.07 | 1.60 | 1.60 |
| Ethanol   | SEC/IEC     |           | 11.1                | 13.2 | 12.5 | 13.5 | 13.9 | 14.8 | 15.4 | 15.9 | 16.1 | 16.3 | 16.8 |      |
|           | Method 3*** |           | 11.4                | 13.4 | 12.5 | 13.6 | 14.0 | 14.9 | 16.0 | 16.2 | 16.5 | 16.9 | 17.3 |      |

**Table S4.** Validation data for organic acids, glucose, and ethanol.

The experimental conditions of the developed method are the same as those in Figure 3.

\* Ion-exclusion-mode IC method, \*\* Enzyme-based 4-aminoantipyrine visual colorimetric method, \*\*\* Vibration-type density meter method.

|                  |      |                         | Brewing time (days)       |       |       |       |       |       |      |      |      |      |      |      |
|------------------|------|-------------------------|---------------------------|-------|-------|-------|-------|-------|------|------|------|------|------|------|
|                  |      |                         | 7                         | 9     | 10    | 11    | 12    | 13    | 15   | 16   | 17   | 18   | 19   |      |
| Disaccharides    | mg/L | SEC/IEC                 | 29601                     | 23213 | 17713 | 15542 | 13638 | 11685 | 8697 | 7823 | 6935 | 6265 | 5663 |      |
|                  |      | Method 4****            | Total                     | 18101 | 13592 | 10443 | 8623  | 8167  | 6077 | 5876 | 4676 | 4395 | 3908 | 3028 |
|                  |      |                         | Maltose                   | 1308  | 1288  | 890   | 633   | 586   | 726  | 769  | 572  | 226  | 338  | 252  |
|                  |      |                         | <i>iso</i> -Maltose       | 15285 | 11031 | 8123  | 6651  | 6323  | 4293 | 3515 | 2692 | 2359 | 2014 | 1834 |
|                  |      |                         | Kojibiose                 | 1031  | 844   | 970   | 896   | 833   | 673  | 1098 | 955  | 1272 | 1070 | 581  |
| Nigerose         | 477  | 429                     | 461                       | 442   | 426   | 385   | 494   | 457   | 539  | 487  | 361  |      |      |      |
| Trisaccharides   | mg/L | SEC/IEC                 | 14627                     | 14121 | 11952 | 11502 | 10868 | 9934  | 7994 | 7358 | 6621 | 6021 | 5372 |      |
|                  |      | Method 4****            | Total                     | 11569 | 13671 | 10790 | 9500  | 9452  | 5444 | 4052 | 4063 | 2928 | 3171 | 2397 |
|                  |      |                         | Panose                    | 3101  | 2182  | 1732  | 1458  | 1396  | 1019 | 978  | 912  | 655  | 678  | 575  |
|                  |      | <i>iso</i> -Maltotriose | 8468                      | 11490 | 9058  | 8041  | 8056  | 4425  | 3074 | 3151 | 2272 | 2493 | 1821 |      |
| Tetrasaccharides | mg/L | SEC/IEC                 | 3065                      | 3096  | 2877  | 3084  | 3195  | 3294  | 3262 | 3257 | 3197 | 3044 | 2877 |      |
|                  |      | Method 4****            | <i>iso</i> -Maltotetraose | 552   | 879   | 829   | 916   | 994   | 910  | 952  | 988  | 912  | 839  | 836  |

**Table S5.** Validation data for oligosaccharides.

\*\*\*\* HILIC-mode chromatographic method.
